# Supplementary material for: Systematic Review: Landscape Characteristics Correlated with Physical Activity of the Elderly People
Source: MDPI journal article supplement (doi:10.3390/land12030605), 2023-03-03
Supplement: s1 [file s1]

## Web of Science search strategy

TITLE-ABS-KEY ({green space} OR "green area\*" OR park\* OR outdoor\* OR natur\* OR wildness\* OR landscape\* OR garden\* OR "privately owned public space\*" OR plaza\*) AND TITLE-ABS-KEY ("old\* people" OR "old\* age" OR "old\* adult" OR "old\* population" OR "aging\* population" OR "population aging\*" OR "elder\* people" OR "elder\* group" OR "elder\* age" OR "elder\* adult" OR {seniors} OR "pensioner" OR "senior citizen\*" OR "retir\* people" OR retir\* OR retirement) AND title-abs-key= ("physical activit\*" OR exercise\* OR "leisure activit\*" OR "MVPA" OR "recreational activit\*" OR "energy consumption" OR "energy expenditure" OR "Tai Chi\*" OR "square danc\*" OR {yang ge} OR {yangco} OR shuttlecock OR "diabolo" OR {badminton} OR "dog walk\*") AND title-abs-key= (accessibility\* OR path\* OR route\* OR trail\* OR facilit\* OR feature OR amenity OR court OR field OR playground OR "play\* area" OR "playing\* space" OR "fitness\* equipment" OR "fitness\* space" OR "fitness\* area" OR seat\* OR {attractive} OR {attractiveness} OR aesthetics\* OR clean OR cleanliness OR incivility OR layout OR "visual focus" OR "visual appeal" OR plant\* OR vegetation OR color OR sight\* OR perceiv\* OR transport\* OR safe\* OR tree OR shelter OR shading\* OR {shaded area} OR {shading area} OR wheelchair OR visual\* OR sight\* OR crime\* OR "green space quality" OR lighting OR visibility OR noise OR maintenance OR condition OR lawn\* OR water\* OR splash\* OR pond\* OR bench\* OR fountain) AND NOT title-abs-key= (medicine\* OR food\* OR clinic\* OR brain OR medical OR parkin\* OR fall OR fraction OR nutrition OR HIV) AND ( LIMIT-TO ( OA,"all" ) ) AND ( LIMIT-TO ( DOCTYPE,"ar" ) ) AND ( LIMIT-TO ( LANGUAGE,"English" ) )

## Scopus search strategy

TS=(green space\* OR green area\* OR park\* OR outdoor\* OR natur\* OR wildness\* OR landscape\* OR garden\* OR privately owned public space\*) AND TS=("old\* people" OR "old\* age" OR "old\* adult" OR "old\*population" OR "old\* group" OR "aging\* people" OR "aging\* population" OR "population aging\*" OR "elder\* people" OR seniors OR pensioner\* OR "senior citizen\*") AND TS=("physical activit\*" OR exercise\* OR "leisure activit\*" OR MVPA OR "recreational activit\*" OR "energy consumption" OR "energy expenditure") AND TS=(accessibility\* OR path\* OR route\* OR trail\* OR facilit\* OR feature OR amenity OR court OR field OR playground OR play NEAR/1 area OR playing NEAR/1 space OR fitness NEAR/1 equipment OR fitness NEAR/1 space OR fitness NEAR/1 area OR seat\* OR attractive OR attractiveness OR aesthetics\* OR clean OR cleanliness OR incivility OR layout OR visual focus OR visual appeal OR plants OR vegetation OR color OR sight\* OR perceiv\* OR transport\* OR safe\* OR tree OR shelter OR shad\* OR wheelchair OR visual\* OR sight\* OR crime\* OR green space quality OR lighting OR visibility OR noise OR maintenance OR condition) NOT TS=(medicine\* OR food\* OR clinic\* OR brain OR medical OR parkin\* OR fall OR fraction OR nutrition OR HIV)

## PubMed strategy

("parks, recreational"[MeSH Terms] OR "Gardens"[MeSH Terms] OR "landscape\*"[All Fields] OR "nature\*"[All Fields] OR "wilderness\*"[All Fields] OR "outdoor\*"[All Fields] OR "plaza\*"[All Fields]) AND ("Exercise"[MeSH Terms] OR "Leisure Activities"[MeSH Terms] OR "Energy Metabolism"[MeSH Terms] OR "MVPA"[All Fields] OR "recreational activit\*"[All Fields] OR "tai chi\*"[All Fields] OR "square danc\*"[All Fields] OR ((yang, ge[Author] OR ge, yang[Author]) OR yang ge[Author]) OR "yangco"[All Fields] OR ("shuttlecock"[All Fields] OR "shuttlecocks"[All Fields] OR "diabolo"[All Fields] OR ("racquet sports"[MeSH Terms] OR ("racquet"[All Fields] AND "sports"[All Fields]) OR "racquet sports"[All Fields] OR "badminton"[All Fields]) OR "dog walk\*"[All Fields]) AND ("Aged"[MeSH Terms] OR "population aging\*"[All Fields] OR ("senior"[All Fields] OR "seniorities"[All Fields] OR "seniority"[All Fields] OR "seniors"[All Fields]) OR "pensioner"[All Fields] OR "senior citizen\*"[All Fields] OR "Retirement"[MeSH Terms]) AND ("Fitness Centers"[MeSH Terms] OR "Esthetics"[MeSH Terms] OR "Incivility"[MeSH Terms] OR "Forests"[MeSH Terms] OR "Color"[MeSH Terms] OR "perceive\*"[All Fields] OR "transport\*"[All Fields] OR "Safety"[MeSH Terms] OR "Trees"[MeSH Terms] OR "Wheelchairs"[MeSH Terms] OR "Crime"[MeSH Terms] OR "Lighting"[MeSH Terms] OR "Noise"[MeSH Terms] OR "Maintenance"[MeSH Terms] OR "fitness equipment\*"[All Fields] OR "lawn\*"[All Fields] OR "splash\*"[All Fields] OR "water\*"[All Fields] OR "pond\*"[All Fields] OR "fountain\*"[All Fields] OR "bench\*"[All Fields])) NOT ("Medicine"[MeSH Terms] OR "Food"[MeSH

Terms] OR "Brain"[MeSH Terms] OR "medical\*"[All Fields] OR "Parking Facilities"[MeSH Terms] OR  
"Accidental Falls"[MeSH Terms] OR "fraction\*"[All Fields] OR "diet, healthy"[MeSH Terms] OR  
"HIV"[MeSH Terms])
